# Supplementary material for: Origins of truncated supplementary capsid proteins in rAAV8 vectors produced with the baculovirus system
Source: PubMed Central journal article supplement (PMC6237368; doi:10.1371/journal.pone.0207414), 2018-11-15
Supplement: pone.0207414.s001.pdf [file pone.0207414.s001.pdf]

**S1 Fig.**

> cap1 (similar to WT sequence)

acggctgccgatgggtatcttccagattggctcgaggacaacctctgagggcattcgcgagtggtgggacttgaacctggagccccgaagcccaaagc  
caaccagcaaaagcaggacgacggccggggtctggtcttctggctacaagtacctcggaccctcaacggactcgacaagggggagcccgtaacgc  
ggcggacgcagcggccctcgagcagcacaaggcctacgaccagcagctcaaagcgggtgacaatccgtaacctcggtataaccagccgacgccgagtt  
tcaggagcgtctgcaagaagatacgtctttgggggcaacctcgggcgagcagcttccaggccaagaagcgggttctgaacctctcggctctggttgagg  
aaggcctaagacggctcctgaaagaaacgtccggtagagcagtcgccacaagagccagactcctcctcgggcatcggcaagacaggccagcagccc  
gctaaaagagactcaatthtggctcagactggcagctcagagtcagctcccgatccacaacctctcggagaacctccagcaacccccgctgctggtggacc  
tactacaatggcttcaggcgggtggcgaccaatggcagacaataacgaaggcgcgacggagtggttaatgcctcaggaaattggcattgcgattccaca  
tggctggggcgacagagtcaccaccagcaccgcacctgggcttggccacctacaataaacctctcaagcaaatctcagtgcttcaacgggggc  
cagcaacgacaaccactactcggctacagcaacccccgggggtatthtattcaacagattccactgccactttcaccacgtgactggcagcagctcatc  
aacaacaattggggattccggccaagagactcaacttcaactctcaacatcaagtcaggaggtcacgacgaatgatggcgtcaaacatcgccta  
ataacctaccagcaggttaagcttctcggactcggagtcaccagctccgtaagtcctcggctctcgcgaccagggtcgcctccctccgttccggcgga  
cgtgttcatgattccgcaatacggctacctgacgctcaacaatggcagccaagcgtgggacgttcatctttactgcctggaatatttccctctcagatgc  
tgagaacgggcaacaactttacctcagctacaccttgaggaaagtcctttccacagcagctacgcgacagccagagcctggaccggctgatgaatcct  
ctcatcgaccaatacctgtattacctaagacaactcaaatcagtcgggaagtcgcaaaacaaggacttgccttttagcctgggtctccagctggcatg  
tctgttcagccaaaactggctacctggacctgttatcggcagcagcgcgtttctaaaacaaaacagacaacaacagcaatttacctggactgg  
tgcttcaaatataacctaattggcggtgaatccatcatcaacctggcactgctatggcctcacacaaagacgacgaagacaagtctttccatgagcgc  
gtgtcatgattttggaaaagagagcgcgggagctcaaacactgcattggacaatgtcatgattacagacgaagaggaaattaaagccactaacctgtg  
gccaccgaaagatttgggacctggcagtcatttccagagcagcagcacagaccctcgcaccggagatgtgcatgctatgggagcattacctggcatgg  
tgtggcaagatagagacgtgtacctgcagggtcccatttgggcaaaatcctcacacagatggacactttcaccgtctcctttatggggggcttggact  
caagaaccgcctcctcagatcctcatcaaaaacacgctgttctcgcgaatcctccggcggagttttagctacaagtttcttattcatcaccataac  
tccacaggacaagtgagtggtgaaatgaatgggagctgcagaaagaaaacagcaagcgtggaatcccgaagtgcagtacacatccaattatgcaaa  
atctgccaacgttgattttactgtggacaacaatggactttatactgagcctcggccattggcacccttacctaccgtccctgttaa

> cap2 (codon-optimized)

acggctgccgacgggtatctaccgattggctcgaggacactctctgaaggaataagacagtggtggaagctcaaacccggcccaccaccaccaaagc  
ccgagagcggcataaggacgacagcaggggcttctgcttccgggtacaagtacctcggaccctcaacggactggacaagggagagccgggtgaacg  
aggcagacgcgctcgcctcagcagcacaagcctacgaccggcagctcgacagcggagacaacacctacctaagtaaacacgcccagcggag  
ttcaggagcgccttaaagaagatacgtctttgggggcaacctcggacgagcagcttccaggcgaaaaagaggggttctgaacctctgggctggttga  
ggaacctgttaagacggctccgggaaaaaagaggcggtagagcactctcctgtggagccagactcctcctcgggaaccggaaaggcggccagcagcc  
tgcaagaaaaagattgaatttggctcagactggagacgacagactcagtaacctgacccccagcctcctcggacagccaccagcagccccctcgtgctggga  
actaatacagatggctacaggcagtgccgaccaatggcagacaataacgaggcgcgacggagtggttaattcctcgggaaattggcattgcgattcca  
catggatgggagcagagtcaccaccagcaccgaacctgggcttggccacctacaacaaccactctacaacaatttccagccaatcaggagc  
ctcgaacgacaatcactacttggctacagcacccttgggggtatthtacttcaacagattccactgccactttcaccacgtgactggcaagactcatc  
aacaacaactggggattccgaccaagagactcaacttcaagcttthtaacattcaagtcgaagaggtcacgcagaatgacggtacgacgacgattgcca  
ataacctaccagcaggttcaggtgttactgactcggagtcaccagctcccgtacgtcctcggctcggcgcacaaagatgcctcccggcttccagcag  
acgtcttcatggtgccacagatggatacctcaccctgaacaacgggagtcaggcagtaggagcgtcttctttactgcctggagtagcttctctcagat  
gctgcgtaccgaaacaacttacctcagctacacttttggagacgttctttccacagcagctacgctcacagccagagtcaggacctctcatgaatcct  
ctcatcgaccagtaacctgtattacttgagcagaacaacactccaagtgaaccaccacgagtcagggctcagtttctcaggccggagcagtgacat  
tcgggaccagcttaggaactggcttctcggacctgttaccgacgagcagtgatcaagacatctcgggataacaacaacagtgataactcgtggactg  
gagctaccaagtaccacctcaatggcagagactctcgtggaatccgggcccggccatggcaagccacaaggacgatgaagaaaagtttttctcagag

cggggttctcatctttgggaagcaaggctcagagaaaacaaatgtggacattgaaaaggctatgattacagacgaagaggaaatcaggacaaccaatcc  
cgtggctacggagcagatggttctgtatctaccaacctccagagaggcaacagacaagcagctaccgcagatgtcaacacacaaggcgttctccaggc  
atggtctggcaggacagagatgtgtaccttcaggggccatctgggcaaagattccacacacggacggacatttaccctctccctcatgggtgattc  
ggactaaacacctcctccacagatttcatcaagaacaccccggtacctgcgaatcttcgaccacctcagtgccgcaagtttgcttcttcatcac  
agtactccacgggacaggtcagcgtggagatcagtgaggagctgcagaaggaaaacagcaaacgctggaatcccgaattcagtacacttcaactaca  
acaagtctgtaatgtggactttactgtggacactaatggcgtgtattcagagcctcgcaccttggcaccagatactgactcgtaatctgtaa

> cap6 (similar to WT sequence)

acggctgccgatggttatctccagattggctcaggacaacctctcagggcattcgcgagtggtgggacttgaacctggagccccgaaacccaaagc  
caaccagcaaaagcaggacgacggccggggtctggtcttctggctacaagtacctcggaccttcaacggactcgacaagggggagccccgtcaacgc  
ggcggatgcagcggccctcgagcagacaaggcctacgaccagcagctcaaagcgggtgacaatccgtacctgaggataaccacgcccagcggagtt  
tcaggagcgtctgcaagaagatacgtctttgggggcaacctcgggcgagcagcttccaggccaagaagagggttctgaaacctttggtctggtgagg  
aagtgctaagcggctcctggaaagaaacgtccggtagagcagctgccacaagacgagactcctcctgggacttggcaagacagccagcagccc  
ctaaaagagactcaatttggtcagactggcagctcagagtcagctcccgaccacaacctctcgagaaacctccagcaacccccgctgctgtgggacct  
actacaatggctcaggcgggtggcgaccaatggcagacaataacgaaggcggcagcggagtgggtaatgcctcaggaaattggcattgcgattccat  
ggctggggcagagatcatcaccaccagcaccgaaatgggcttggccacctataacaaccacctctacaagcaaatctccagtgcttcaacgggggc  
cagcaacgacaaccactactcggctacagcaccctgggggtattttgattcaacagattcactgccatttctaccacgtgactggcagcagctcatc  
aacaacaattggggattccggccaagagactcaacttcaagctcttcaacatcaagtcaggaggtcacgacgaatgatggcgtcacgacctcgtca  
ataacctaccagcacggttaagcttctcggactcggagtaccagttgcgtactctcggctctgcgcaccagggtgcctccctccgttccggcgga  
cgtgttcatgattccgcagtagcggctacctaacgctcaacaatggcagccaggcagtgggcaggtcatcctttactgctggaatatttccatcgagatg  
ctgagaacgggcaataactttaccttcagctacacctcagaggcagtcctttccacagcagctacgcacagccagagcctggaccggctgatgatcc  
tctcatcgaccagctgattacctgaacagaactcagaatcagtcgggaagtgccaaaacaaggacttgctgttagccgggggtctccagctggcat  
gtctgttcagccaaaaactggctacctggacctgttaccggcagcagcgcgtttctaaaacaaaaacagacaacaacagcaactttacctggactg  
gtgcttcaaaatataaccttaattgggctgtaattataatcaacctggcactgctatggcctcacaaaagacgacaagacaagttcttccatgagcg  
gtgtcatgattttggaaggagagcggcggagcttcaaacactgcattggacaatgtcatgatcacagacgaagaggaaatcaaagcactaacccgt  
ggccaccgaaagatttgggactgtggcagctcaatctccagagcagcagcacagacctcgcaccggagatgtgcatgttatgggagccttacctggaatg  
gtgtggcaagacagagactatactcagggtcctatttgggcaaaattcctcacacggatggacactttaccctctcctctcatggcggtttgga  
cttaagcaccctcctcagatcctcatcaaaaacacgcttctcgcgaatcctccggcagagtttccggctacaagtttgcttattcatcaccagta  
ttcacaggacaagtgcgctggagattgaatgggagctgcagaaagaaaacagcaaacgctggaatcccgaagtgcagatatacatctaactatgaaa  
atctgcaacgttgatttactgtggaacaacaatggactttactagcctcgcaccttggcaccggttacctaccctccctgtaa

> cap8 (codon-optimized)

acggctgccgacggttatctaccgattggctcaggacaacctctcagggcattcgcgagtggtgggacctcaaacccggcgtcctaagccaaaggc  
taaccaacagaaacaagacgacggacgcggtcttccccggttcaaaatcctaggaccttcaacgggctggacaagggcgaacctgtgaacgc  
tgcggagcccgtcccttgagcagataaggcttacgaccagcaactgcaggccggcagacaaccttaccttctgataaccacgcccagcgtgaattcc  
aggagcgtctgcaagaagatacgtcttttgggggcaacctcgggcgagcagcttccaggccaagaagcgggttctgaaacctctcggtctggtgaggaa  
ggcgttaagacggctcctgaaagaagagaccggttagagcatcaccagcgttctcagactccttacgggcatcggcaagaaaggccaacagccc  
gccagaaaaagactcaatttggtcagactggcagctcagagtcagttccagacctcaacctcgggaaacctccagcagcgcctctggtgtgggacc  
taataaatggctcaggcgggtggcgaccaatggcagacaataacgaaggcggcagcggagtgggtagttcctcgggaaattggcattgcgattccaca  
tggctggggcagacagatcatcaccaccagcaccgaaacctgggacctgccacctacaacaaccacctctacaagcaaatctcaacgggacatcggga  
ggagccaccaacgacaacactactcggctacagcaccctgggggtattttgacttaacagattcactgccacttttaccacgtgactggcagcga  
ctcatcaacaacactggggattccggccaagagactcagcttcaagcttcaacatccaggtcaaggaggtcacgcagaatgaaggccaagacc  
atcgcaataacctcaccagcaccatccaggtgttacggactcggagtaccagctgccgtacttctcggctctgccaccagggtgcctgcctccgttcc  
cggcgagcgtgttcatgattcccagtagcggctacctaacactcaacaacggtagtcaggccgtgggacgctcctccttactgctggaatacttcttc  
gcagatgtgagaaccggcaacaacttccagtttacttacacctcagggcagtcctttccacagcagctaccccacagccagagcttgaccggctga

tgaatcctctgattgaccagtacctgtactacttgtctcggactcaaacaacaggaggcacggcaaatacgcagactctgggcttcagccaaggtgggcct  
aatacaatggccaatcaggcaaagaactggctgccaggacctgttacgccaacaacgcgtctcaacgacaaccgggcaaaacaacaatagcaacttt  
gcctggactgctgggaccaatacatctgaatggaagaaattcattggctaactctggcatcgtatggcaacacacaagacgacgaggagcgttttt  
tcccagtaacgggatcctgattttggcaaaaaatgctgccagagacaatgctggattacagcgtatgctcaccagcgaggaagaatcaaaacc  
actaacctgtggctacagaggaatacggatcgtggcagataactgacgagcaaaacacggctcctcaaattggaactgtcaacagccagggggcct  
taccggatggtctggcagaaccgggacgtgtactgacgggtccatctgggccaagattcctcacagggacggcaacttccaccctctccgctgatg  
ggcggctttggcctgaaacatcctccgctcagatcctgatcaagaacacgctgtactgacggatcctccgaccacttcaaccagtcaaagctgaactct  
ttcatcacgaatacagcaccggacaggtcagcgtggaattgaatgggagctgcagaaggaaaacagcaagcgtggaaccccgagatccagtacac  
ctccaactactacaatctacaagtgtggactttgtgttaatacagaaggcgtgtacttgaaccccgccccattggcacccgttacctcaccgtaactg  
taa

> cap8 (similar to WT sequence)

acggctgccgatggttatcttccagattggctcaggacaacctctgagggcattcgcgagtggtgggcctgaaacctggagccccgaagcccaaagc  
caaccgcaaaagcaggacgacggccgggctgtgcttctggctacaagtacctcggaccttcaacggactcgacaagggggagcccgtaacgc  
ggcggacgacggccctcgagcagacaaggcctacgaccagcagctgcaggcgggtgacaatccgtacctcgggtataaccaagcggacgcccaggtt  
tcaggagcgtctgaagaagatacgtctttgggggcaacctcggcgagcagcttccaggccaagaagcgggttctgaaacctctcggctgtggtgagg  
aaggcgtaaagcggctcctggaagaagagaccggttagagccatcacccagcgttctccagactcctctacgggcatcggcaagaaggccaacagc  
ccggcagaaaaagactcaatttggctcagactggcactcagagtcagttccagacctcaacctctcggagaacctccagcagcctcctggtgtggga  
cctaatacaatggctcaggcgggtggcgaccaatggcagacaataacgaaggcggcagcggagtggttagttcctcgggaaattggcattgcgattcca  
catggctggcgacagagtcaccaccagcaccgaacctgggacctgccacctaacaaccacctctacaagcaaatctcaacgggacatcggg  
aggagccaccaacgacaacactactcggctacagcaccctgggggtattttgactttaacagattccactgccacttttaccacgtgactggcagcg  
actcatcaacaacaactggggattccggccaagagactcagttcaagcttcaacatccaggtcaaggaggtcagcagaatgaaggccaacagc  
catcggcaataacctcaccagcaccatccaggtttacggactcggagaccagctgcccgtactcctcggctctgcccaccagggtgctgctcctcgtt  
ccggcggacgtgttcatgattcccagtagcggctacctaactcaacaacgtagtcaggccgtgggacgctcctccttactgcctggaatacttctt  
cgcagatgctgagaaccggcaacaactccagtttactacacctcaggacgtgctttccacagcagctacgccacagccagagcttgaccggctg  
atgaatcctctgattgaccagtacctgtactacttgtctcggactcaaacaacaggaggcacggcaaatacgcagactctgggcttcagccaaggtggg  
taatacaatggccaatcaggcaagaactggctgccaggacctgtaccgccaacaacgcgtctcaacgacaaccgggcaaaacaacaatagcaactt  
tgctcggactgctgggacaaataccatctgaatggaagaaattcattggtaatcctggcatcgtatggcaacacacaagacgacgaggagcgtttt  
ttccagtaacgggatcctgattttggcaaaaaatgctgccagagacaatcgggattacagcgtatgctcaccagcgaggaagaatcaaaac  
cactaacctgtggctacagaggaatacggatcgtggcagataactgacgagcaaaacacggctcctcaaattggaactgtcaacagccagggggcc  
ttaccggatggtctggcagaaccgggacgtgtacctgacgggtccatctgggccaagattcctcacagcggcgaacttccaccctctccgctgatg  
ggcggctttggcctgaaacatcctccgctcagatctgatcaagaacacgcctgtacctgaggatcctccgaccacttcaaccagtcaaagctgaactct  
ttcatcacgaatacagcaccggacaggtcagcgtggaattgaatgggagctgcagaaggaaaacagcaagcgtggaaccccgagatccagtacac  
ctccaactactacaatctacaagtgtggactttgtgttaatacagaaggcgtgtacttgaaccccgccccattggcacccgttacctcaccgtaactg  
taa

> cap9 (codon-optimized)

acggctgccgacggttatctaccgattggctcaggacaaccttctgaaggaattcgcgagtggtgggctctaaacctggagcccccaacccaaggc  
aatcaacaacatcaagacaacgctcagggtctgtctcgggttacaataccttggaccggcaacggactcgacaagggggagccggtcaacgca  
gcagacgcgccggccctcgagcagacaaggcctacgaccagcagctcaaggccggagacaacctgacctcaagtacaaccacccgacgccgaggtt  
ccaggagcggctcaaagaagatacgtctttgggggcaacctcggcgagcagcttccaggcaaaaagaggcttctgaaaccttggctgtggtgagg  
aagcggctaagacggctcctggaagaagaggcctgtagagcagctcctcaggaaaccggactcctccggggtattggcaaatcgggtgcacagccc  
ctaaaaagagactcaatttggctcagactggcgacacagagtcagtcaccagacctcaaccaatcgggagaacctcccagccccctcaggttgggac  
tcttacaatggcttcaggtggtggcgaccagtgccagacaataacgaagtgccgatggagtggttagttcctcgggaaattggcattgcgattccaat  
ggctgggggacagagtcaccaccagcaccgaacctgggacctgccacctaacaacatcactctacaagcaaatctcaacagcacatctggagg  
atcttcaatgacaacgcctactcggctacagcaccctgggggtattttgacttcaacagattccactgccacttctaccacgtgactggcagcgact

atcaacaacaactggggattccggcctaagcgactcaacttcaagcttcaacattcagggtcaaagaggttacggacaacaatggagtcaagaccatcg  
ccaataaccttaccagcacgggtccagggtcttacggactcagactatcagctcccgtacgtgctcgggtcggctcacgagggtgcctcccgcgttccag  
cggacgttttcatgattcctcagtagcgggtatctgacgcttaatgatggaagccaggccgtgggtcgttcctttactgctggaatattcccgtcgcaa  
atgctaagaacgggtaacaacttccagttcagctacgagtttgagaacgtaccttccatagcagctacgctcacagccaaagcctggaccgactaatgaa  
tccactcatcgaccaatacttgtactatctctcaaagactattaacgggtctggacagaatcaaaaacgctaaaattcagtggtggccggaccgacaacat  
gggtgtccaggaagaaactacatacctggaccagctaccgacaacaacgtgtctcaaccactgtgactcaaaaacaacagcgaatttgcttggcct  
ggagcttcttgggctctcaatggacgtaatagcttgatgaatcctggactgctatggccagccacaaagaaggagaggaccgtttcttcttctgtctg  
gatcttaattttggcaacaaggaactggaagagacaacgtggatgacggaacaaagtcatgataaccaacgaagaagaaataaaactactaacccgg  
tagcaacggagtcctatggacaagtgccacaaaccaccagagtgccaaagcacaggcgagaccgggtgggttcaaaaaccaaggaatacttccgggta  
tggttggcaggacagagatgttacctgcaaggaccatttgggcaaaattcctcacacggacggcaactttcaccttctccgctgatgggagggttg  
gaatgaagcaccgcctcctcagatcctcatcaaaaacacactgtacctgaggatcctcaacggccttcaacaaggacaagctgaacttttcatcacc  
cagatttactggccaagtcagcgtggagatcagtgaggagctgcagaaggaacagcaagcgtggaaccggagatccagtacacttccaactatt  
acaagtctaataatgttgaattgctgtaataactgaaggtgatatagtgaacccccccattggcaccagatactgactcgtaatctgtaa

>cap rh10 (codon-optimized)

acggctgcccagcgttatctaccgattggctcgaggacaacctctgagggcattcgcgagtggtgggactgaaacccggcgtccgaaacccaaag  
ccaaccaacagaaacaagacgacggccgctggtgctgcccggctacaaatacctgggacccttcaacggcctggacaagggtgaaccgtgaacg  
ccgaggacgccggccttggagcacgacaaggcctaccagcaactcaaaagcggcgacaacccgtacctgctataaccacgccgacgggaa  
ttcaggagcgtctgcaagaagatacgtcttttggggcaacctcggcgagcagcttccaggccaagaagcgggttctcgaacctctcggtctggttga  
gaaggcgttaagcggctcctggaagaagagaccgtagagccatccccagcgttctcagactcctctacgggcatcggcaagaaaggccagcag  
cccgcgaaaaagagactcaacttgggcagactggcagctcagagtcagtgcccggacctcaaccaatcgagaaaccccccgaggccccctctggtctg  
gatctggtacaatggctgacggcgtggcgtccaatggcagacaataacgaaggcggcagcggagtggttagttcctcaggaaattggcattgcgattc  
cacatggctggcgacagagtcaccaccagcaccgaacctgggcccctcccactacaacaaccactctacaagcaaatctcaacgggactctg  
ggaggaagcaccaacgacaacacttccggctacagcaccctgggggtatttggacttaacagattccactgcccacttctcaccagtgactggcag  
cgactcatcaacaacaactggggattccggccaagagactcaacttcaagcttcaacatccagggtcaaggaggtcacgcagaatgaaggaccaag  
accatcgcaataaccttaccagcacgattcaggtctttacggactcggaaataccagctcccgtacgtcctcggctctgcgcaccagggtgctgctccgt  
tccggcgagcgttctatgattcctcagtagcgggtacctgactctgaacaatggcagtcaggccgtgggcccgttctccttactgctgagtagtacttct  
tctcaaatgctgagaacgggcaacaactttagttcagctaccagtttaggacgtgccttttcaagcagctacgcgcacagccaaagcctggaccggct  
gatgaacccccctatcgaccagtagtacttactctcggactcagtcacgggaggtaccgcaggaactcagcagttgtattttctcaggccgggccc  
taataacatgctggctcaggccaaaaactggctaccgggcccctgctaccggcagcaacgcgtctccacgacactgtcgcaaaataacaacagcaactt  
gcctggaccggtgccaccaagtatcatctgaatggcagagactctctggtaaatcccgtgtcgtatggcaaccacaaggacgacgaagagcgat  
tccgtccagcggagtctaatgtttgggaaacaggagctggaaaagacaactggactatagcagcgttatgctaaccagtgaggaaagaaataaaacc  
accaaccagtgccacagaacagtagcggcgtggtggccgataacctgcaacagcaaacgcgctcctattttagggggcgtcaacagtcaggagcc  
ttacctggcatggtctggcagaaccgggacgtgtacctgagggtcctatctgggccaagattcctcacacggacggaaactttcatccctcgccgtgatg  
ggaggcttggactgaaacaccgcctcctcagatcctgattaagaatacactgttcccggatcctcaactacctcagtaagtaagctggcgtcg  
ttcatcacgtagtacgacccggacaggtcagcgtggaattgaatgggagctgcagaaagaaaacagcaaacgctggaaccagagattcaatacact  
tccaactactacaatactacaataatgtggacttctgctgtaaacacagatggcacttattctgagcctcgcccatcggcaccggtacctcaccctgta  
a
