# Supplementary material for: Origins of truncated supplementary capsid proteins in rAAV8 vectors produced with the baculovirus system
Source: PubMed Central journal article supplement (PMC6237368; doi:10.1371/journal.pone.0207414), 2018-11-15
Supplement: pone.0207414.s002.pdf [file pone.0207414.s002.pdf]

| Primer            | Sequence 5' to 3'                                                                                                      | Purpose*                                                  |
|-------------------|------------------------------------------------------------------------------------------------------------------------|-----------------------------------------------------------|
| CC-KO-F           | CCGCTGTTGAAACAATATTTTATAATACCCTGTTTATAGTTAACAATGTCGGCAGCGTCTA<br>TGGCCATAGGAATAGGGCCTACCGTTCGTATAATGTATGCTATACGAAGTTAT | chitinase/cathepsin<br>gene deletion nt<br>105771- 107700 |
| CC-KO-R           | CCGCTGTTGAAACAATATTTTATAATACCCTGTTTATAGTTAACAATGTCGGCAGCGTCTA<br>TGGCCATAGGAATAGGGCCTACCGTTCGTATAATGTATGCTATACGAAGTTAT | chitinase/cathepsin<br>gene deletion nt<br>105771- 107700 |
| chitinase-105625F | CGCGGCCGTACATGGCGACGCCCA                                                                                               | Gene KO Verification                                      |
| cathepsin-107849R | GTTTTTAAAGGTCCAATATGGAATG                                                                                              | Gene KO Verification                                      |
| p10-KO-F          | TTGTATATTAATTAATAACTATACTGTAATTACATTTTATTACAATCTACCGTTCGTATA<br>GCATACATTATACGAAGTTAT                                  | p10 ORF KO nt<br>118839 - 119121                          |
| P10-KO-R          | GAATCGTACGAATATTATAAAACAATTGATTTGTTATTTTAAAAACGATTTACCGTTCGTAT<br>AATGTATGCTATACGAAGTTAT                               | p10 ORF KO nt<br>118839 - 119121                          |
| p10-118725-F      | CCGGGACCTTTAATTCAACCCAACA                                                                                              | Gene KO Verification                                      |
| p10-119259-R      | CAGCATTTGTTATACACACAGAACT                                                                                              | Gene KO Verification                                      |
| M13pucF           | CCAGTCACGACGTTGTAAAACG                                                                                                 | Verification of<br>transposed bacmid                      |
| M13pucR           | AGCGGATAACAATTTACACAGG                                                                                                 | Verification of<br>transposed bacmid                      |
| Genta             | AGCCACCTACTCCCAACATC                                                                                                   | Verification of<br>transposed bacmid                      |
| ITR-F             | CTCCACTAGGGGTTCTTG                                                                                                     | QPCR in rAAV ITR                                          |
| ITR-R             | GTAGATAAGTAGCATGGC                                                                                                     | QPCR in rAAV ITR                                          |
| ITR-P             | [FAM] TAGTTAATGATTAACCC [MGB-NFQ]                                                                                      | QPCR probe in rAAV<br>ITR                                 |
| titin-F           | AAAACGAGCAGTGACGTGAGC                                                                                                  | Mus musculus titin<br>gene QPCR                           |
| titin-R           | TTCAGTCATGCTGCTAGCGC                                                                                                   | Mus musculus titin<br>gene QPCR                           |
| titin-P           | [VIC] TGCACGGAAGCGTCTCGTCTCAGTC [TAMRA]                                                                                | Mus musculus titin<br>gene QPCR probe                     |
| VP1-KO-F          | ggattcctgccccacTgctgccgacggtatctaccgattggc                                                                             | AAV2 VP1 silencing**                                      |
| VP1-KO-R          | ccaatcgggtagataaccgtcggcagcAgtggcggcaggaatcc                                                                           | AAV2 VP1 silencing**                                      |
| VP2-KO-F          | cctggtgaggaacctgtaagacCgctccgggaaaaagagccggtagagcactctcc                                                               | AAV2 VP2 silencing**                                      |
| VP2-KO-R          | ggagagtgcctaccggcctcttttcccggagcGgtcttaacaggttcccaaccagg                                                               | AAV2 VP2 silencing**                                      |

\* Baculovirus numbering is performed accordingly to Ayres et al., 1994. FAM: 6-carboxyfluorescein. TAMRA: tetramethylrhodamine. MGB-NFQ: Minor Groove Binding-Non Fluorescent Quencher

\*\* Upper case correspond to modified nucleic acids
